# Supplementary material for: Genetic Susceptibility and Childhood Adversity: Gene-Environment Interaction in Attention-Deficit/Hyperactivity Disorder
Source: Research Square preprint supplement (doi:10.21203/rs.3.rs-7427552/v1), 2025-09-17
Supplement: Supplementary file 1 [file 1863c99e56937ed4cd8b3659.xlsx]

## Sheet: Suppl Table 1
Supplementary Table 1. Results of the case-only PGSADHD-environment interaction analysis considering exposures to emotional abuse, violence in the family and/or extreme family stress, stratified by sex.
		Males					Females				Sex difference &
Exposure	N exposed	N non-exposed	OR int	OR 95% CI	P int	N exposed	N non-exposed	OR_int	OR 95% CI	P int	Z	P
Emotional Abuse	115	418	1.3196	(1.07,1.63)	0.0107	97	204	1.3314	(1.01,1.75)	0.041	0.0503	0.9599
Violence in the family	62	467	1.347	(1.02,1.77)	0.0332	47	253	1.3995	(0.99,1.99)	0.0599	0.1683	0.8663
Extreme Family Stress	135	395	1.3193	(1.08,1.61)	0.0073275	106	195	1.0327	(0.79,1.34)	0.81	-1.4474	0.1478
Emotional abuse, violence in the family, or extreme family stress	185	348	1.4028	(1.16,1.69)	0.000369645	146	156	1.2196	(0.95,1.57)	0.1256	-0.871	0.3838
& Z-statistic comparing the interaction effects between males and females (Z = (β_female − β_male) / √(SE_female² + SE_male²)). The P-value refers to the associated two-tailed p-value testing whether the difference between sexes is statistically significant.
