# Supplementary material for: Genetic Susceptibility and Childhood Adversity: Gene-Environment Interaction in Attention-Deficit/Hyperactivity Disorder
Source: Research Square preprint supplement (doi:10.21203/rs.3.rs-7427552/v1), 2025-09-17
Supplement: Supplementary file 2 [file 1f442d867575c44a5c5df84c.xlsx]

## Sheet: Table 1
Table 1. Results of the case-only PGSADHD-environment interaction analysis considering multiple preinatal and childhood exposures; Results are shown for the main analysis as well as for the sensitivity analysis to assess the robustness of the primary results by adding the PGS for childhood maltreatment into the model.
Exposure	N	N effective*		Main analysis				Sensitivity
			OR	OR 95% CI	P **		OR	OR 95% CI	P **
Loss or separation from loved one	824	675.335	1.15822	(0.99,1.36)	0.0712688		.	.	.
Sexual Abuse	831	239.663	1.15592	(0.88,1.51)	0.288711		.	.	.
Physical Abuse	830	357.86	1.17704	(0.95,1.46)	0.137414		.	.	.
Emotional Abuse	834	632.441	1.30522	(1.11,1.54)	0.00144385		1.30711	(1.11,1.54)	0.0014014
Violence in the family	829	378.673	1.34885	(1.09,1.66)	0.00533328		1.33201	(1.08,1.65)	0.00792219
Neglect	830	191.465	1.26793	(0.94,1.71)	0.117325		.	.	.
Extreme Family Stress	831	684.428	1.18702	(1.01,1.39)	0.0320992		1.18733	(1.01,1.39)	0.0323217
Economic problems/poverty/financial stress	827	401.79	1.20556	(0.98,1.48)	0.0758026		.	.	.
Cesarean Birth	255	83.702	0.937221	(0.56,1.56)	0.803507		.	.	.
Birth Complications	232	195.517	1.3504	(0.80,2.29)	0.26423		.	.	.
Emotional abuse, violence in the family, or extreme family stress&	835	799.157	1.31368	(1.13,1.52)	0.000279032		1.3135	(1.13,1.52)	0.000291871
* N effective was calculated with the formula (4*NYes*NNo)/(NYes+NNo), for each binary exposure.
** P-values < 0.05 are shown in bold.
& Stressful life events showing evidence of significant interaction after sensitivity analyses, namely emotional abuse, violence in the family and/or extreme family stress, combined into a single variable indicating exposure to at least one of such events.
