# Supplementary material for: Genetic Susceptibility and Childhood Adversity: Gene-Environment Interaction in Attention-Deficit/Hyperactivity Disorder
Source: Research Square preprint supplement (doi:10.21203/rs.3.rs-7427552/v1), 2025-09-17
Supplement: Supplementary file 3 [file 41f8c2213fb7a977d997df5b.xlsx]

## Sheet: Suppl Table 3
Supplemmentary Table 3. Sex-stratified comparison of ADHD-related phenotypes showing evidence of association with the exposure to emotional abuse, violence in the family and/or extreme family stress in the main analysis.
				Males							Females
				Individuals exposed			Individuals non exposed				Individuals exposed			Individuals non exposed
Category	Questionnaire	Variable		N	Summary*		N	Summary*	P.Value&		N	Summary*		N	Summary*	P.Value&
ADHD symptoms	Diagnostic Interview for ADHD in Adults 2.0 (DIVA)	Number of ADHD symptoms in adulthood		185	15 (5)		348	13 (5)	2.31e-06		146	15 (5)		156	13.5 (5)	0.00127101
	Conners' Adult ADHD Rating Scales – Observer Version (CAARS)	ADHD Index		131	68.2 (11.2)		225	65.7 (10.0)	0.0276458		90	68.4 (12.4)		78	63.8 (11.9)	0.0160244
		Hyperactive-Impulsive Symptoms		131	65.3 (13.8)		225	60.2 (13.9)	0.00108911		90	63.3 (13.3)		78	57.1 (12.9)	0.0027631
		Impulsivity		131	63.4 (12.2)		225	59.1 (11.7)	0.00119633		90	63.8 (13.2)		78	58.3 (11.8)	0.00542772
	Wender Utah Rating Scale (WURS)	Childhood ADHD symptoms		169	55 (26)		309	48 (27)	0.000938778		128	57 (29)		139	47 (24)	0.000543655
Cognitive performance	Conners' Continuous Performance Test, 3rd Edition (CPT3)	Omission errors		125	55.0 (19.4)		217	50.7 (18.5)	0.01		92	57.6 (18.9)		78	53.1 (12.9)	0.11
Functional impairment	Sheehan Disability Inventory (SDI)	Family life impairment		170	7 (3)		300	7 (3)	0.06		133	7 (3)		130	6 (3)	0.00271792
		Social life impairment		169	6 (3)		300	5 (4)	0.000351483		133	6 (4)		130	6 (3)	0.49
Psychiatric comorbidity	Beck Depression Inventory II (BDI-II)	Depressive symptoms		171	15.0 (10.1)		309	12.1 (8.4)	0.00145493		131	16.2 (8.9)		136	14.0 (9.5)	0.049
*In the Summary, continuous data is summarized by mean (standard deviation); binary data with the percent of cases; and ordinal data with the median (IQR).
& The statistical test used depended on the nature of each variable: (i) Student’s t- test for continuous variables considered normally distributed (with skewness and kurtosis values between -1 and 1); and (ii) non-parametric Mann-Whitney U test for continuous variables not normally distributed (based on skewness and kurtosis values outside the range -1 to 1).
