# Supplementary material for: Genetic Susceptibility and Childhood Adversity: Gene-Environment Interaction in Attention-Deficit/Hyperactivity Disorder
Source: Research Square preprint supplement (doi:10.21203/rs.3.rs-7427552/v1), 2025-09-17
Supplement: Supplementary file 4 [file e88f28c0f58d073399328c19.xlsx]

## Sheet: Suppl Table 1
Supplementary Table 1. Results of the case-only PGSADHD-environment interaction analysis considering exposures to emotional abuse, violence in the family and/or extreme family stress, stratified by sex.
		Males					Females				Sex difference &
Exposure	N exposed	N non-exposed	OR int	OR 95% CI	P int	N exposed	N non-exposed	OR_int	OR 95% CI	P int	Z	P
Emotional Abuse	115	418	1.3196	(1.07,1.63)	0.0107	97	204	1.3314	(1.01,1.75)	0.041	0.0503	0.9599
Violence in the family	62	467	1.347	(1.02,1.77)	0.0332	47	253	1.3995	(0.99,1.99)	0.0599	0.1683	0.8663
Extreme Family Stress	135	395	1.3193	(1.08,1.61)	0.0073275	106	195	1.0327	(0.79,1.34)	0.81	-1.4474	0.1478
Emotional abuse, violence in the family, or extreme family stress	185	348	1.4028	(1.16,1.69)	0.000369645	146	156	1.2196	(0.95,1.57)	0.1256	-0.871	0.3838
& Z-statistic comparing the interaction effects between males and females (Z = (β_female − β_male) / √(SE_female² + SE_male²)). The P-value refers to the associated two-tailed p-value testing whether the difference between sexes is statistically significant.

## Sheet: Suppl Table 2
Supplemmentary Table 2. Comparison of ADHD-related phenotypes between individuals exposed and non-exposed to emotional abuse, violence in the family and/or extreme family stress.
				Individuals exposed			Individuals non exposed
Category	Questionnaire	Variable	N	N	Summary*		N	Summary*	P. Value&	P. Value corrected**
ADHD symptoms	Diagnostic Interview for ADHD in Adults 2.0 (DIVA)	Number of ADHD symptoms in adulthood	835	331	15 (5)		504	13 (5.2)	2.69407e-09	6.73518e-08
	Conners' Adult ADHD Rating Scales – Observer Version (CAARS)	ADHD Index	524	221	68.3 (11.7)		303	65.2 (10.5)	0.00162792	0.0406979
		Inattention Symptoms	524	221	67.3 (11.5)		303	66.6 (12.0)	0.504376	1
		Hyperactive-Impulsive Symptoms	524	221	64.4 (13.6)		303	59.4 (13.7)	3.83219e-05	0.000958048
		Total ADHD Symptoms	524	221	67.8 (11.7)		303	65.0 (11.4)	0.00629399	0.15735
		Inattention	524	221	68.5 (12.0)		303	67.2 (12.0)	0.20915	1
		Hyperactivity	524	221	59.7 (12.8)		303	57.3 (12.9)	0.0385648	0.964121
		Impulsivity	524	221	63.5 (12.6)		303	58.9 (11.7)	1.50648e-05	0.00037662
		Self-Concept Problems	524	221	61.7 (11.7)		303	59.0 (11.6)	0.007776	0.1944
	Wender Utah Rating Scale (WURS)	Childhood ADHD symptoms	745	297	55 (27)		448	48 (25.2)	2.12386e-06	5.30965e-05
	Others	Age at ADHD Diagnosis	455	177	31.2 (11.3)		278	29.9 (12.7)	0.287072	1
Cognitive performance	Conners' Continuous Performance Test, 3rd Edition (CPT3)	Omission errors	512	217	56.1 (19.2)		295	51.3 (17.2)	0.000277199	0.00692998
		Perseverations	512	217	62.9 (50.8)		295	55.4 (22.0)	0.0355991	0.889977
		HRT (sequence change)	512	217	51.9 (10.6)		295	50.9 (10.6)	0.291226	1
		HRT ISI (sequence change)	512	217	51.8 (13.3)		295	52.9 (12.5)	0.7352	1
Functional impairment	Sheehan Disability Inventory (SDI)	Family life impairment	733	303	7 (3)		430	7 (3)	0.000519687	0.0129922
		Social life impairment	732	302	6 (4)		430	5 (3)	0.00114199	0.0285497
		Work impairment	732	302	7 (2)		430	7 (3)	0.0307294	0.768235
	Functioning Assessment Short Test (FAST)	Autonomy	253	99	4 (4)		154	4 (4)	0.367194	1
		Occupational Functioning	228	89	3 (5)		139	3 (6)	0.961174	1
		Cognitive Functioning	261	103	9 (5)		158	8 (5)	0.52107	1
		Financial Issues	264	103	2 (4)		161	1 (3)	0.130851	1
		Interpersonal Relationships	240	89	4 (4)		151	3 (5)	0.13623	1
		Leisure Time	257	101	2 (4)		156	2 (3)	0.990172	1
Psychiatric comorbidity	Structured Clinical Interview for DSM-IV (SCID)	Substance Use Disorder	783	317	35.0%		466	25.5%	0.00545811	0.136453
	Beck Depression Inventory II (BDI-II)	Depressive symptoms	747	302	15.5 (9.6)		445	12.7 (8.7)	2.9097e-05	0.000727425
	State-Trait Anxiety Inventory (STAI)	Trait Anxiety	676	273	80 (52)		403	75 (56)	0.00307995	0.0769987
Personality traits / Impulsivity	Barratt Impulsiveness Scale (BIS-11)	Impulsivity score	507	197	70.0 (14.9)		310	67.0 (16.0)	0.03	0.75
	Zuckerman–Kuhlman Personality Questionnaire (ZKPQ)	Impulsive Sensation Seeking	378	147	56.9 (8.2)		231	56.0 (8.6)	0.365409	1
		Neuroticism-Anxiety	386	150	59.4 (8.5)		236	57.2 (8.8)	0.0172539	0.431348
		Aggression-Hostility	376	153	56.1 (7.5)		223	54.5 (7.1)	0.0385186	0.962965
		Sociability	380	152	51.2 (6.9)		228	50.8 (7.1)	0.565014	1
		Activity	380	151	55.8 (6.7)		229	54.5 (7.2)	0.078536	1
*In the Summary, continuous data is summarized by mean (standard deviation); binary data with the percent of cases; and ordinal data with the median (IQR).
& The statistical test used depended on the nature of each variable: (i) chi-square test for binary variables; (ii) Student’s t- test for continuous variables considered normally distributed (with skewness and kurtosis values between -1 and 1); and (iii) non-parametric Mann-Whitney U test for continuous variables not normally distributed (based on skewness and kurtosis values outside the range -1…
** Corrected P values were obtained by multiplying the uncorrected p.value by the number of effective tests, estimated with the method described by Li & Ji, 2005. Significant P-values are shown un bold.

## Sheet: Suppl Table 3
Supplemmentary Table 3. Sex-stratified comparison of ADHD-related phenotypes showing evidence of association with the exposure to emotional abuse, violence in the family and/or extreme family stress in the main analysis.
				Males							Females
				Individuals exposed			Individuals non exposed				Individuals exposed			Individuals non exposed
Category	Questionnaire	Variable		N	Summary*		N	Summary*	P.Value&		N	Summary*		N	Summary*	P.Value&
ADHD symptoms	Diagnostic Interview for ADHD in Adults 2.0 (DIVA)	Number of ADHD symptoms in adulthood		185	15 (5)		348	13 (5)	2.31e-06		146	15 (5)		156	13.5 (5)	0.00127101
	Conners' Adult ADHD Rating Scales – Observer Version (CAARS)	ADHD Index		131	68.2 (11.2)		225	65.7 (10.0)	0.0276458		90	68.4 (12.4)		78	63.8 (11.9)	0.0160244
		Hyperactive-Impulsive Symptoms		131	65.3 (13.8)		225	60.2 (13.9)	0.00108911		90	63.3 (13.3)		78	57.1 (12.9)	0.0027631
		Impulsivity		131	63.4 (12.2)		225	59.1 (11.7)	0.00119633		90	63.8 (13.2)		78	58.3 (11.8)	0.00542772
	Wender Utah Rating Scale (WURS)	Childhood ADHD symptoms		169	55 (26)		309	48 (27)	0.000938778		128	57 (29)		139	47 (24)	0.000543655
Cognitive performance	Conners' Continuous Performance Test, 3rd Edition (CPT3)	Omission errors		125	55.0 (19.4)		217	50.7 (18.5)	0.01		92	57.6 (18.9)		78	53.1 (12.9)	0.11
Functional impairment	Sheehan Disability Inventory (SDI)	Family life impairment		170	7 (3)		300	7 (3)	0.06		133	7 (3)		130	6 (3)	0.00271792
		Social life impairment		169	6 (3)		300	5 (4)	0.000351483		133	6 (4)		130	6 (3)	0.49
Psychiatric comorbidity	Beck Depression Inventory II (BDI-II)	Depressive symptoms		171	15.0 (10.1)		309	12.1 (8.4)	0.00145493		131	16.2 (8.9)		136	14.0 (9.5)	0.049
*In the Summary, continuous data is summarized by mean (standard deviation); binary data with the percent of cases; and ordinal data with the median (IQR).
& The statistical test used depended on the nature of each variable: (i) Student’s t- test for continuous variables considered normally distributed (with skewness and kurtosis values between -1 and 1); and (ii) non-parametric Mann-Whitney U test for continuous variables not normally distributed (based on skewness and kurtosis values outside the range -1 to 1).
