# Supplementary figures and images for: Genetic Susceptibility and Childhood Adversity: Gene-Environment Interaction in Attention-Deficit/Hyperactivity Disorder
Source: Research Square preprint supplement (doi:10.21203/rs.3.rs-7427552/v1), 2025-09-17

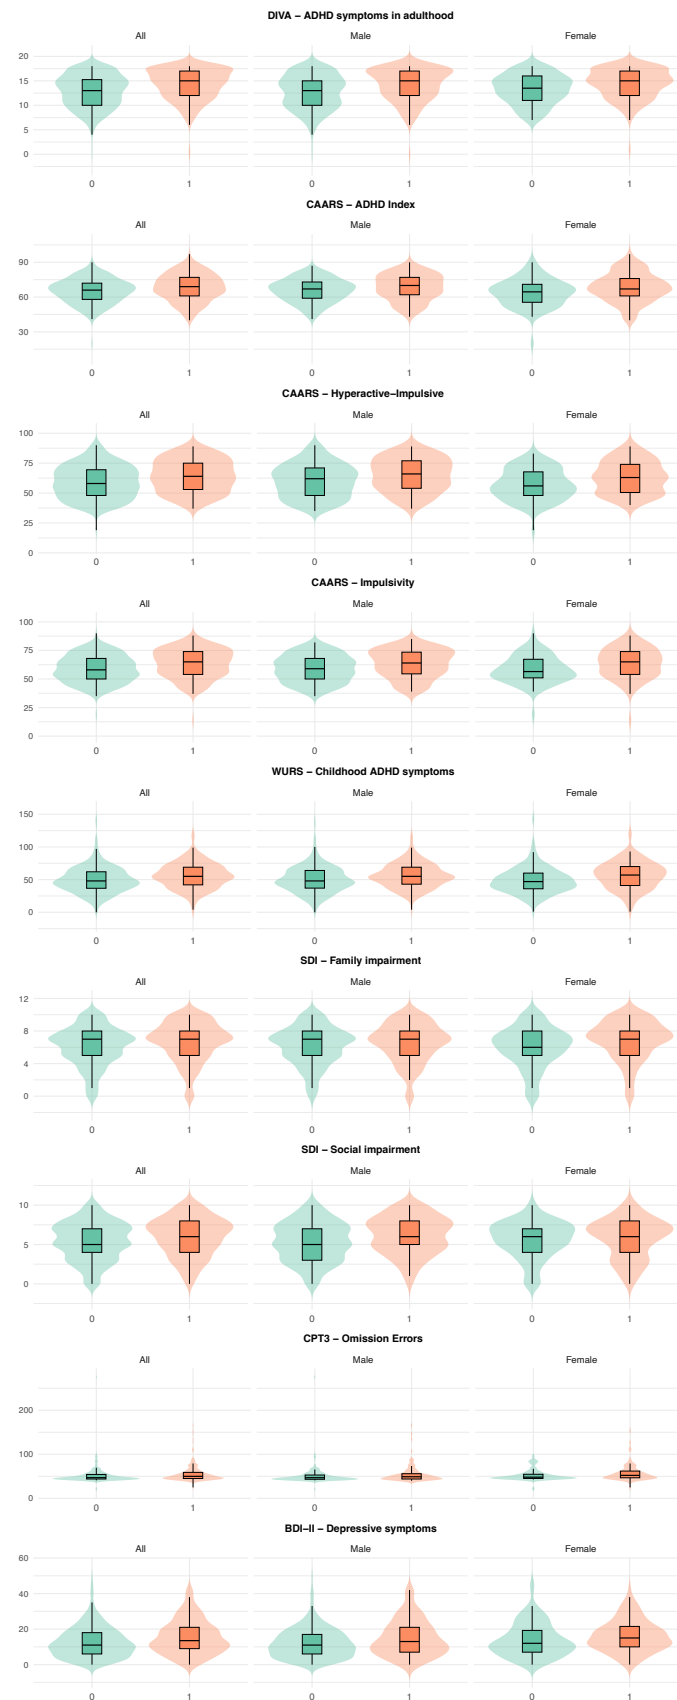

Supplementary Figure S3.

Supplement: Supplementary file 1 [file 177711b60672d4ebd9fcf782.pdf]

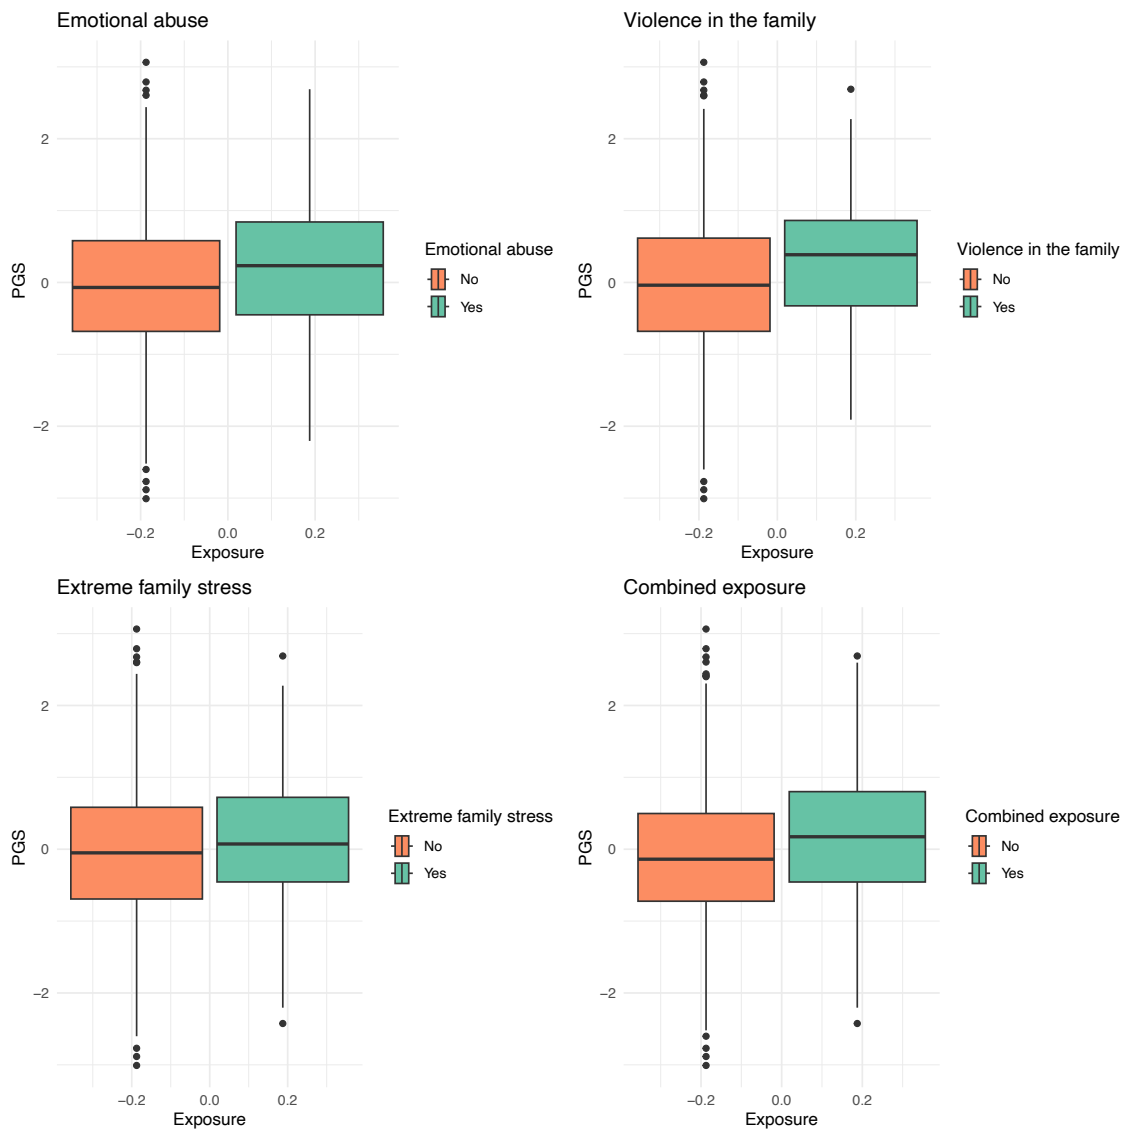

Supplementary Figure S1.

Supplement: Supplementary file 2 [file 69b39a9568ceb417ca4d01d4.pdf]
